# Supplementary material
Source: PubMed Central journal article supplement (PMC3222210)
Supplement: supp_138.24.5333_DEV072546TableS1.pdf [file supp_138.24.5333_DEV072546TableS1.pdf]

**Table S1. Primers**

|                                                    |                                                                                                                                                                                                          |
|----------------------------------------------------|----------------------------------------------------------------------------------------------------------------------------------------------------------------------------------------------------------|
| pGADT7-TRIM28                                      | <i>EcoRI</i> from PCR-amplified cDNA fragment using primers TTAGAATTCCTTGCGTGATAGTGGCAGTAAGG and TAAGAATTCCTGGTTCTACCAGCACAGCAG                                                                          |
| pGBKT7-DBD-ZFP568 (full length)                    | <i>EcoRI</i> from PCR-amplified cDNA fragment using primers AATTGTCGACACCCAGCCTTGAAATACCAG and AATTGTCGACTGTTATCCACCACAGGGTTTT                                                                           |
| pGBKT7-DBD-ZFP568 (KRAB domains)                   | <i>EcoRI</i> from PCR-amplified cDNA fragment using primers ATGTGCGACACCCAGCCTTGAAATACCAG and AATTGTCGACCTCACTGGCCTTGCCTTAC                                                                              |
| pGBKT7-DBD-ZFP568 (ZF domains)                     | <i>EcoRI</i> from PCR-amplified cDNA fragment using primers AATTGTCGACGTAAGGCAAAGGCCAGTGAG and AATTGTCGACTGTTATCCACCACAGGGTTTT                                                                           |
| pAcGFP-ZFP568                                      | <i>BamHI-XhoI</i> from PCR-amplified cDNA fragment using primers TCAGATCTCGAGATGGAGCGCTTGCCAGATG and ACCGGTGGATCCCGTCACTCCTCCGCTCTGTATG                                                                  |
| pCMV-Myc-TRIM28                                    | <i>EcoRI</i> from PCR-amplified cDNA fragment using primers TTAGAATTCGTCCGGCTGCTTCTCAG and TAAGAATTCGTGGTTCTACCAGCACAGCAG                                                                                |
| <i>chatwo</i> site directed mutagenesis            | CCTGGCCCTGTTCTGGAATGAACCATGCCGTC and GACGGCATGGTTCATTCCAGAACAGGGGGAGG were used on pGADT7-TRIM28, pCDNA3-Flag-TRIM28, pCDNA3.1-Gal4DBD-TRIM28, pCMV-Myc-TRIM28 to generate <i>chatwo</i> mutant versions |
| D7CU11                                             | CATGTCTATATGAGCATCCCAAGA and GAGTCTACTATGCAACAAGTGTCTTT                                                                                                                                                  |
| D7CU14                                             | TGAGCCTACACGAGACACCA and GTCTAACCTGGGCCACACAG                                                                                                                                                            |
| <i>chatwo</i> -RFLP with <i>BslI</i>               | ATGTGTTGTGTGGCCAGTA and ACCTCTGGCACCTGCAAC                                                                                                                                                               |
| <i>Trim28</i> cDNA for in situ hybridization probe | TOPO cloning of PCR-amplified cDNA fragment with primers GTGGAGCCTCATGGTGAGAT and TCCAAGCCTGAGCTGGTACT                                                                                                   |
| <i>Trim28</i> for qRT-PCR                          | GTGGAGCCTCATGGTGAGAT and TACTTCCATGGGCTGGCTAC                                                                                                                                                            |
| <i>Zfp568</i> for qRT-PCR                          | TGACCCAGCCTTGAAATACC and AGGCCTGGTCTGTCTTCTT (Shibata and Garcia-Garcia, 2011)                                                                                                                           |
| IAP 5' UTR for qRT-PCR                             | CGGGTCGCGGTAATAAAGGT and ACTCTCGTCCCAAGCTGAA (Rowe et al., 2010)                                                                                                                                         |
| <i>Gapdh</i> for qRT-PCR                           | ACTGCCACCCAGAAGACTGT and GATGCAGGGATGATGTTCTG                                                                                                                                                            |
